# Supplementary material for: Fermentation of Jamaican Cherries Juice Using Lactobacillus plantarum Elevates Antioxidant Potential and Inhibitory Activity against Type II Diabetes-Related Enzymes
Source: Molecules. 2021 May 12;26(10):2868. doi: 10.3390/molecules26102868 (PMC8151855; doi:10.3390/molecules26102868)
Supplement: Supplementary file 1 [file molecules-26-02868-s001.zip › molecules-1212451-supplementary.pdf]

## Supplementary

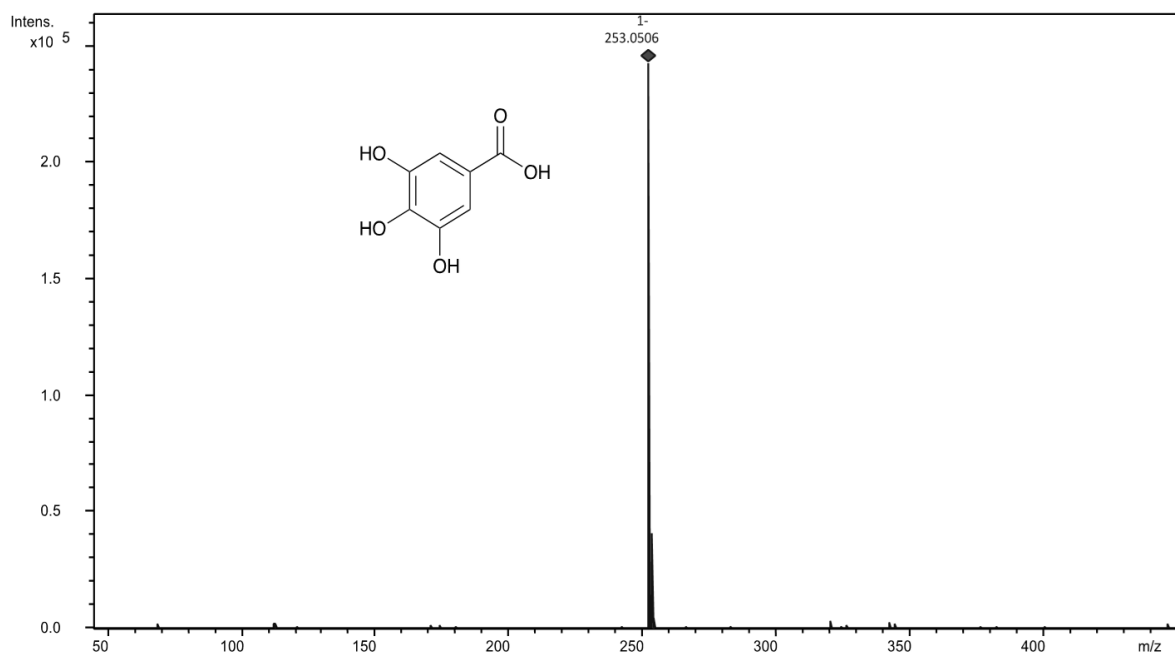

**Figure S1.** Peak A, found in fermented Jamaican cherry juice with a negative HR-ESI-TOF-MS  $m/z$  235.0506  $[M+H]^-$ .

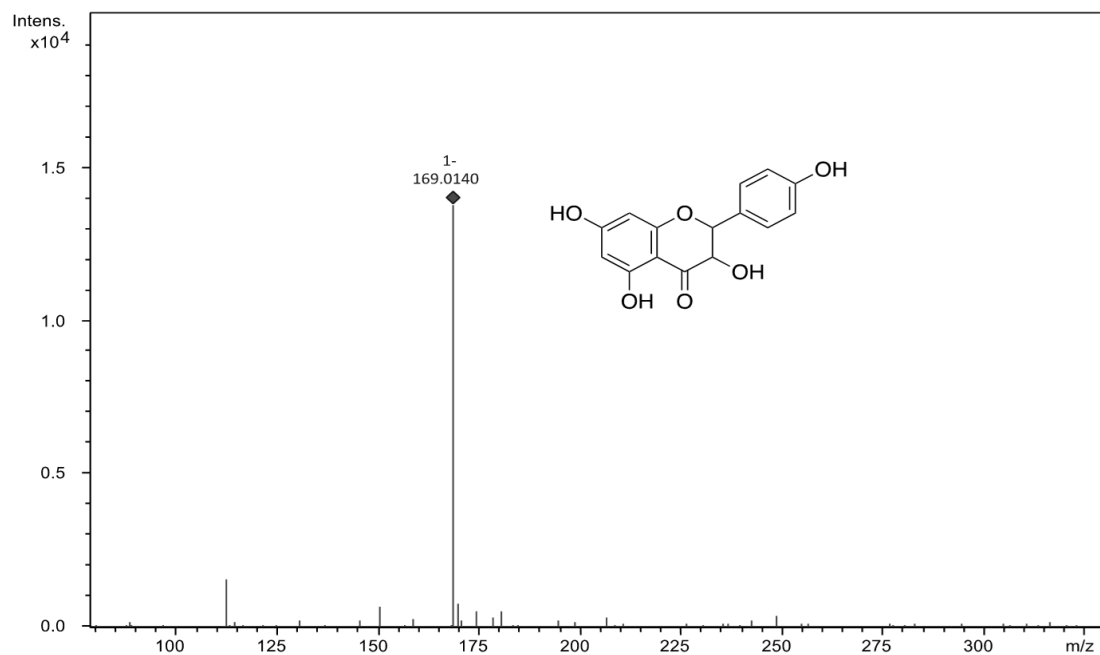

**Figure S2.** Peak B, found in fermented Jamaican cherry juice with a negative HR-ESI-TOF-MS  $m/z$  169.0140  $[M+H]^-$ .

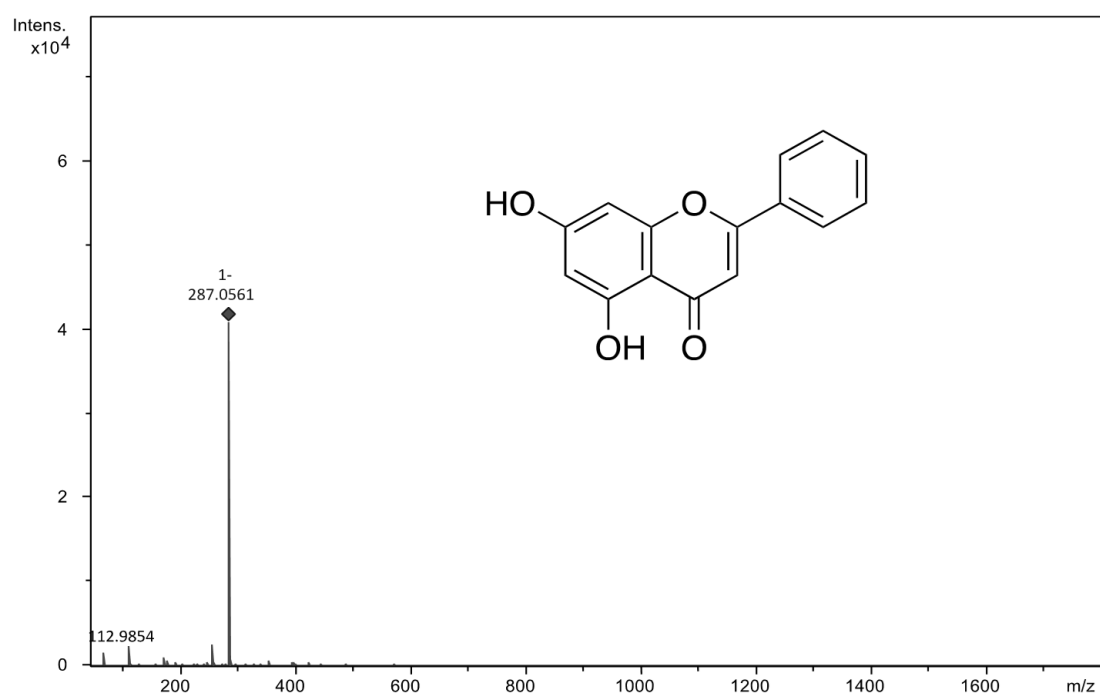

**Figure S3.** Peak C, found in fermented Jamaican cherry juice with a negative HR-ESI-TOF-MS  $m/z$  287.0561  $[M+H]^-$ .
